# Supplementary material for: A self-crosslinking monomer, α-pinene methacrylate: understanding and exploiting hydrogen abstraction
Source: Royal Society of Chemistry journal article supplement (doi:10.1039/d2py00878e), 2022-01-01
Supplement: d2py00878e1.pdf [file d2py00878e1.pdf]

## Supporting Information

### A Self-Crosslinking monomer; $\alpha$ -Pinene Methacrylate. Understanding and Exploiting Hydrogen Abstraction

Olivia R Monaghan,<sup>a†</sup> Stephen T. Skowron,<sup>a†</sup> Jonathan C Moore,<sup>a†</sup> María Pin-Nó,<sup>a</sup> Kristoffer Kortsen,<sup>a</sup> Rachel L. Atkinson,<sup>a</sup> Eduards Krumins,<sup>a</sup> Joachim C Lentz,<sup>a</sup> Fabricio Machado,<sup>a,d</sup> Zeynep Onat,<sup>a</sup> Adam Brookfield,<sup>b</sup> David Collison,<sup>b</sup> Andrei N Khlobystov,<sup>a</sup> Davide S.A. De Focatiis,<sup>c</sup> Derek J Irvine,<sup>c</sup> Vincenzo Taresco,<sup>a\*</sup> Robert A Stockman<sup>a\*</sup> and Steven M Howdle<sup>a\*</sup>

<sup>†</sup>these authors contributed equally

<sup>a</sup> School of Chemistry, University of Nottingham, University Park, Nottingham NG7 2RD, Nottingham, UK. e-mail: [vincenzo.taresco@nottingham.ac.uk](mailto:vincenzo.taresco@nottingham.ac.uk), [robert.stockman@nottingham.ac.uk](mailto:robert.stockman@nottingham.ac.uk) and [steve.howdle@nottingham.ac.uk](mailto:steve.howdle@nottingham.ac.uk)

<sup>b</sup> Department of Chemistry, The University of Manchester, Manchester M13 9PL, UK

<sup>c</sup> Faculty of Engineering, University Park, Nottingham NG7 2RD, Nottingham, UK

<sup>d</sup> Institute of Chemistry, University of Brasília, Campus Universitário Darcy Ribeiro, 70910-900, Brasília, DF, Brazil.

| Hydrogen abstraction | IBMA | $\alpha$ PMA | $\beta$ PMA |
|----------------------|------|--------------|-------------|
| 1                    | -    | 29.6         | 11.4        |
| 2                    | 43.8 | 32.7         | 28.7        |
| 3                    | 49.6 | 53.0         | 39.7        |
| 4                    | 82.4 | 78.6         | 65.2        |
| 5                    | 47.3 | 78.2         | 66.3        |
| 6                    | 48.0 | 75.1         | 60.1        |
| 7                    | 60.6 | *            | 40.7        |
| 8                    | 59.8 | 75.0         | 53.3        |
| 9                    | 59.1 | 68.7         | 59.3        |
| 10                   | 64.6 | 81.3         | 71.1        |

**Table S1.** The energies in kJ/mol of each hydrogen abstraction from IBMA,  $\alpha$ PMA, and  $\beta$ PMA (see figure DFT.a in the main text for atom labels). The lowest energy abstractions are in bold. \*The removal of hydrogen atom 7 in  $\alpha$ PMA resulted in a radical on position 1 following optimisation.

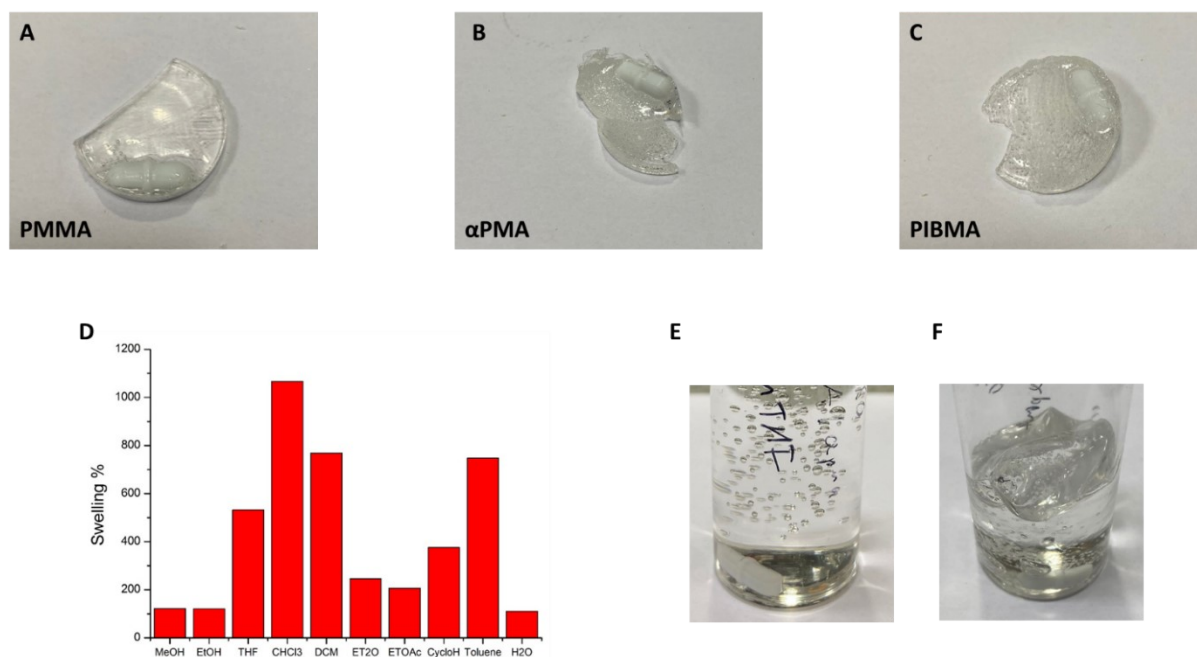

**Figure S1.** A-B-C) Physical appearance of PMMA, P $\alpha$ PMA and PIBMA after 24h reaction; D) P $\alpha$ PMA swelling% in different solvents and E) THF insolubility of PIBAM- P $\alpha$ PMA 70/30% mol/mol (air bubbles are visible and persistent after shaking) and F) tendency to swell of PMMA- P $\alpha$ PMA 70/30% mol/mol.

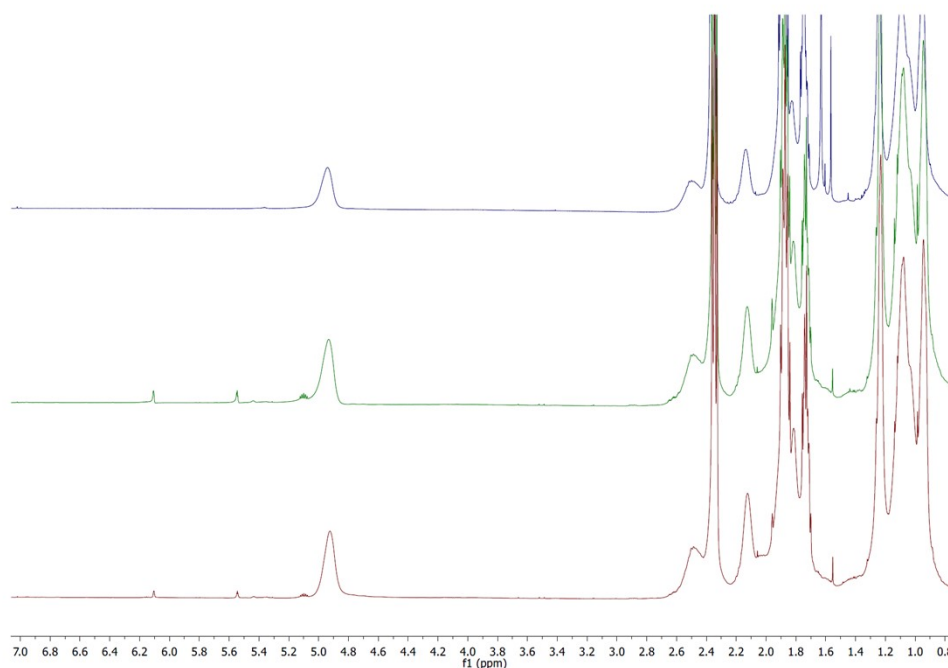

**Figure S2.**  $\alpha$ PMA  $^1\text{H}$ NMR spectra after 24h reaction at 1:4 (bottom), 1:6 (centre) and 1:1,5 (top) monomer:solvent dilution.

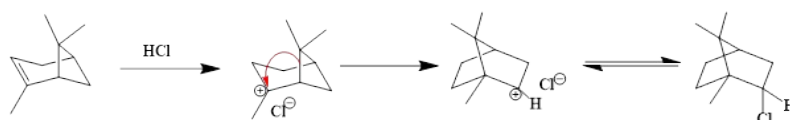

**Figure S3:** Mechanism for the rearrangement of  $\alpha$ -pinene through the addition of HCl to form bornyl chloride.

## Electron Paramagnetic Resonance (EPR)

Electron paramagnetic resonance (EPR) is a technique commonly employed to monitor the propagating radicals during radical polymerisations.<sup>1-4</sup>

In situ EPR was utilised to monitor the bulk free radical polymerisation of  $\alpha$ PMA, initiated by AIBN, in an attempt to identify both the propagating radicals and the presence of any new radical centre that might be responsible for the crosslinking reaction. Although it was promising that the propagation of  $\alpha$ PMA exhibited the same 9-line spectrum as MMA (Figure S4(b)), we were not able to see the next step, i.e., to ascertain the position of the radical formed upon the pendant group which leads to crosslinking. This is most likely due to the proposed radical on the pendant group having a short lifetime, and also being present in only a very low concentration in comparison to the propagating

radical, and these are the likely reasons that it could not be detected under the measurement conditions.

Our data showed an initial radical with a 1:3:3:1 hyperfine splitting pattern, indicating that the radical was coupling to three equivalent  $I = \frac{1}{2}$  nuclei, and therefore adjacent to a  $\text{CH}_3$  group. The EPR spectrum of the AIBN initiating radical is well established and shows as a quintuplet of triplets, which was not seen in this work.<sup>5</sup> This 1:3:3:1 pattern is therefore attributed to the initial propagating tertiary radical on a short oligomeric chain, situated close to the AIBN end group (Figure S4(a)). We deduce that due to the strong electron withdrawing nature of the cyano moiety, the  $\text{CH}_2$  group  $\beta$  to the tertiary radical (Figure S4(a), position A) does not contribute to the initial splitting. Therefore, only the  $\text{CH}_3$  group  $\beta$  to the tertiary radical (Figure S4(a), position B) interacts, and hence leads to the 1:3:3:1 splitting pattern.

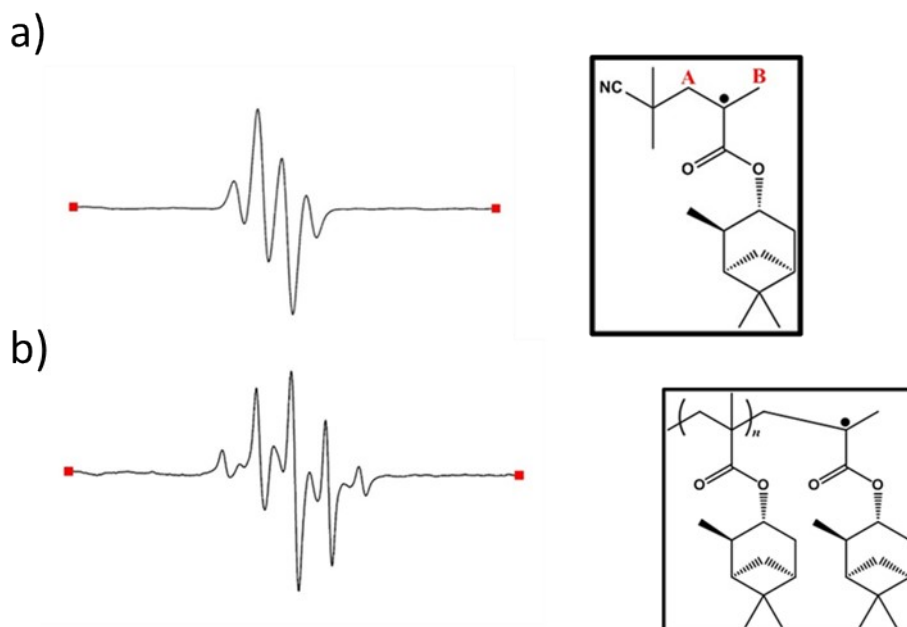

**Figure S4.** (a) Initial (within first 5mins) in situ X band (9.4 GHz) EPR spectrum of the polymerisation of  $\alpha$ -pinene methacrylate at 65 °C showing 1:3:3:1 splitting pattern. (b) 9-line in situ EPR spectrum of the propagation of  $\alpha$ PMA at 65 °C.

Within the first 5 minutes of the experiment, this splitting pattern changed to a 9-line spectrum that can be attributed to the tertiary propagating radical of  $\alpha$ PMA (Figure S4(b)) in which the effect of the no longer adjacent CN group is now lost. As a control experiment, we followed the polymerisation of MMA at 65°C. Here, there was no observable initial 1:3:3:1 splitting pattern, but the more complex 9-line spectrum was present. This is most likely due to a much faster initiation period for MMA, meaning that the contribution by the AIBN end group was simply too fast for our measurements. This corresponds well with what has been observed previously by others for the propagation of MMA.<sup>5-7</sup> It has been proposed that this 9-line spectrum is actually derived from a single radical by the overlap of five and four line spectra; because interaction of the five  $\beta$  protons ( $\text{CH}_2$  and  $\text{CH}_3$ ) with the radical are limited by rotational restrictions, meaning the radical can only interact with either the  $\text{CH}_3$  or the  $\text{CH}_2$  protons, leading to the appearance of a 9-line spectrum.<sup>8</sup>

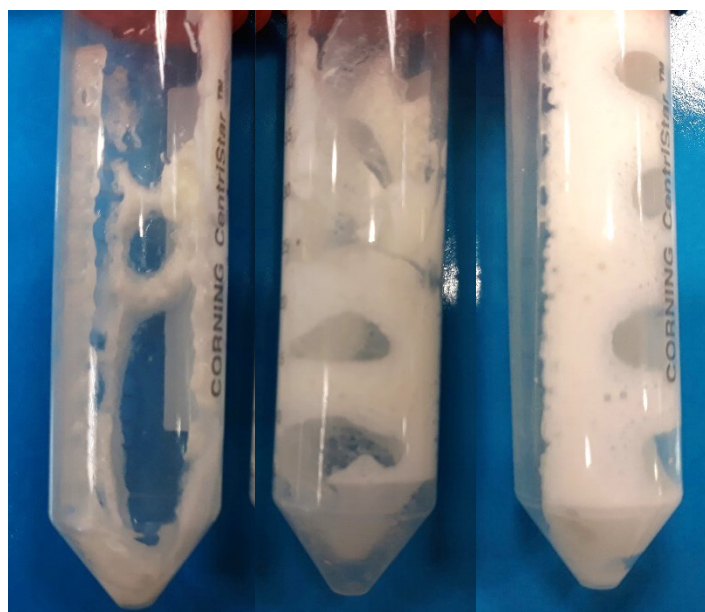

**Figure S5:** Images of P $\alpha$ PMA polyHIPE at 80, 85 and 90 v% water (internal phase) polymerised using 5 wt% SPAN-80 emulsifier.

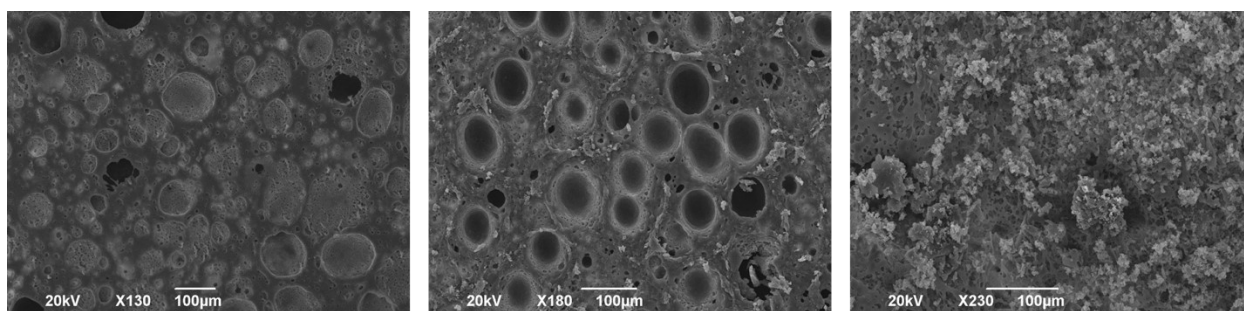

**Figure S6:** SEM images of PαPMA polyHIPE at 80, 85 and 90 v% water (internal phase) polymerised using 20 wt% SPAN-80 emulsifier which did not lead to a stable HIPE.

1. Barth, J.; Buback, M.; Hesse, P.; Sergeeva, T., Termination and Transfer Kinetics of Butyl Acrylate Radical Polymerization Studied via SP-PLP-EPR. *Macromolecules* **2010**, *43* (9), 4023-4031.
2. Gilbert, B. C.; Smith, J. R. L.; Milne, E. C.; Whitwood, A. C.; Taylor, P., Kinetic and structural EPR studies of radical polymerization. Monomer, dimer, trimer and mid-chain radicals formed via the initiation of polymerization of acrylic acid and related compounds with electrophilic radicals ( $\cdot\text{OH}$ ,  $\text{SO}_4^{\cdot-}$  and  $\text{Cl}_2^{\cdot-}$ ). *Journal of the Chemical Society, Perkin Transactions 2* **1994**, (8), 1759-1769.
3. Yamada, B.; Sakamoto, K., ESR study of radical polymerization of styrene 7. Hyperfine structures of ESR spectra of propagating radicals from substituted styrenes. *Polymer* **2000**, *41* (15), 5619-5623.
4. Buback, M.; Hesse, P.; Junkers, T.; Sergeeva, T.; Theis, T., PLP Labeling in ESR Spectroscopic Analysis of Secondary and Tertiary Acrylate Propagating Radicals. *Macromolecules* **2008**, *41* (2), 288-291.
5. Kamachi, M., Electron Spin Resonance Studies of Radical Polymerization. In *Controlled Radical Polymerization*, American Chemical Society: 1998; Vol. 685, pp 145-168.
6. Hermosilla, L.; Calle, P.; Sieiro, C.; García, N.; Tiemblo, P.; Guzmán, J., DFT study of the EPR spectral pattern of propagating methacrylic radicals. *Chemical Physics* **2007**, *340* (1), 237-244.
7. Oldfield, F. F.; Yasuda, H. K., ESR study of MMA polymerization by a peroxide/amine system: Bone cement formation. *Journal of Biomedical Materials Research* **1999**, *44* (4), 436-445.
8. Grassie, N., Polymer degradation and electron spin resonance spectroscopy. In *Pure and Applied Chemistry*, 1968; Vol. 16, p 389.
